# Supplementary material for: Spatiotemporal patterns of synchronous heavy rainfall events in East Asia during the Baiu season
Source: Copernicus journal article supplement (doi:10.5194/esd-2020-69), 2020-10-05
Supplement: Supplementary file [file esd-2020-69-RC1-supplement.pdf]

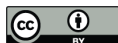

# Spatiotemporal patterns of synchronous heavy rainfall events in East Asia during the Baiu season

Frederik Wolf<sup>1,2</sup>, Ugur Ozturk<sup>1,3</sup>, Kevin Cheung<sup>4</sup>, and Reik V. Donner<sup>1,5</sup>

<sup>1</sup>Research Domain 4 - Complexity Science, Potsdam Institute for Climate Impact Research (PIK) - Member of the Leibniz Association, Telegrafenberg, 14473 Potsdam, Germany

<sup>2</sup>Department of Physics, Humboldt University, Newtonstraße 15, 12489 Berlin, Germany

<sup>3</sup>Helmholtz Centre Potsdam – GFZ German Research Centre for Geosciences, 14473 Potsdam, Germany

<sup>4</sup>Climate Research, Climate and Atmospheric Science, NSW Department of Planning, Industry and Environment, 4 Parramatta Square, Parramatta NSW 2150, Australia

<sup>5</sup>Department of Water, Environment, Construction, and Safety, Magdeburg–Stendal University of Applied Sciences, Breitscheidstraße 2, 39114 Magdeburg, Germany

**Correspondence:** Frederik Wolf (frederik.wolf@pik-potsdam.de)

**Abstract.** Investigating the synchrony and interdependency of heavy rainfall occurrences is crucial to understand the underlying physical mechanisms and reduce physical and economic damages by improved forecasting strategies. In this context, studies utilizing functional network representations have recently contributed to significant advances in the understanding and prediction of extreme weather events. To thoroughly expand on previous works employing the latter framework to the East Asian Summer Monsoon (EASM) system, we focus here on changes in the spatial organization of synchronous heavy precipitation events across the monsoon season (April to August) by studying the temporal evolution of corresponding network characteristics in terms of a sliding window approach. Specifically, we utilize functional climate networks together with event coincidence analysis for identifying and characterizing synchronous activity from daily rainfall estimates between 1998 and 2018. Our results demonstrate that the formation of the Baiu front as a main feature of the EASM is reflected by a double-band structure of synchronous heavy rainfall with two centers north and south of the front. Although the two separated bands are strongly related to either low- or high-level winds which are commonly assumed to be independent, we provide evidence that it is rather their mutual interconnectivity that changes during the different phases of the EASM season in a characteristic way. Our findings shed some new light on the interplay between tropical and extratropical factors controlling the EASM intraseasonal evolution, which could potentially help to improve future forecasts of the Baiu onset in different regions of East Asia.

## 1 Introduction

The Asian Summer Monsoon dominates the rainfall pattern over South and East Asia, thereby impacting nearly a third of the world's population. Disregarding the western (Arabian Sea) branch of the Indian Summer Monsoon (ISM), this major weather system is mainly initiated over Southeast Asia and the maritime continent, from which one branch expands westward to the Bay of Bengal and Eastern Indian Ocean, forming the eastern branch of the ISM (Yihui and Chan, 2005). A second branch, the East Asian Summer Monsoon (EASM), progressively moves northward along the western edge of the Northwest Pacific



Subtropical High (NPSH) following the gradual northward migration of the upper-level jet (Suda and Asakura, 1955; Okada and Yamazaki, 2012). The main EASM related frontal pattern largely contributes to the annual rainfall over the Philippines and China (as Mei-yu), Korean peninsula (as Changma) and Japan (as Baiu) during May, June, and July (Fukui, 1970; Preethi et al., 2017; Li et al., 2018) and will be briefly referred to as the Baiu season in this study.

25 The Baiu front extends east-to-northeastward from the Tibetan Plateau towards the Western Pacific Ocean over Southern Japan linking Arctic and tropical circulation patterns, where cool polar maritime air masses intersect with warm maritime tropical air (Sampe and Xie, 2010). The resulting quasi-stationary subtropical frontal zone gradually expands and progressively shifts northward from Taiwan (25°N) up to western Japan (40°N) in about 40 days. The tropical Western Pacific, the South China Sea, and the Bay of Bengal supply the moisture that propagates eastward along the front with the middle and upper tropospheric circulations (Ninomiya and Muraki, 1986; Krishnan and Sugi, 2001). The front retreats associated with the convective activity over the northwestern Pacific and the northward shift of the NPSH from late July onward (Ninomiya and Muraki, 1986; Ueda and Yasunari, 1995; Okada and Yamazaki, 2012). The onset and strength of Baiu vary on an interannual basis (Zhu et al., 2013), which reduces its predictability via repetitive atmospheric circulation systems associated with large-scale teleconnection patterns like the Antarctic Oscillation, South Asian Anticyclone (SAA), and El Niño Southern Oscillation (Zhu et al., 2008; Choi et al., 2012; Li et al., 2018).

The dynamical organization of particularly heavy rainfall events across the EASM domain is relevant in the context of anticipating and mitigating corresponding natural disasters like flash floods or landslides. In a related context, Wang et al. (2019) have recently pointed to a considerable likelihood of consecutive extreme flood and heatwave events in Japan (like observed in July 2018), which further emphasizes the need to better understand the emergence of such situations. Moreover, being able to accurately predict the onset of the Baiu frontal system could heavily impact the agricultural activities in the affected regions that ultimately depend on water supply by the associated heavy (yet not necessarily the most severe) downpours, but requires further improvement of our understanding of EASM in terms of both, its external controls and internal dynamics..

Addressing the aforementioned problems is complicated by the fact that the spatiotemporal organization of heavy rainfall in monsoon-dominated regions is very complex. Therefore, disentangling the governing processes across time and space requires specific statistical-dynamical approaches that are not part of the classical toolbox of statistical climatology. For the specific situation in East Asia, it has to be noted that in addition to monsoon-related heavy rainfall resulting from the internal Baiu dynamics, typhoons constitute another type of phenomena that are often associated with such events. The spatiotemporal dynamics of heavy rainfall associated with typhoons has been recently studied by Ozturk et al. (2018, 2019) with methods originating from the field of complex networks. Similar *functional network* representations of climate variability (Tsonis and Roebber, 2004; Donges et al., 2009; Donner et al., 2017; Dijkstra et al., 2019) have already been successfully used in past works to identify regions where heavy rainfall coherently occurs over considerably large spatial regions, e.g., in the context of the ISM (Malik et al., 2010, 2012; Stolbova et al., 2014), the South American Monsoon System (SAMS) (Boers et al., 2013, 2014; Gelbrecht et al., 2018), or the Australian Summer Monsoon (Cheung and Ozturk, 2020). For the EASM, an initial study employing a network-based analysis (He et al., 2014) has only recently been complemented by further research revealing distinct precipitation pattern for the Baiu and typhoon seasons over Japan (Ozturk et al., 2019). This growing body



of literature, together with a vast amount of additional climate network based studies not focusing explicitly on extreme events (see, e.g., Donner et al., 2017; Dijkstra et al., 2019, for some recent overviews), indicates that this approach has great potentials for contributing to a better understanding of the spatiotemporal organization of climate variability in general, and heavy precipitation events in particular.

60 In this work, we focus on the Baiu-related heavy rainfall events and do not consider explicitly the effect of tropical cyclones. Moreover, we expand the study area of Ozturk et al. (2019) beyond the core Baiu frontal region to better characterize large-scale synchronous occurrences of heavy rainfall events along with the progress of the Baiu season. Specifically, we explore the temporal evolution of Baiu associated coherent heavy rainfall events over an extended spatial region covering vast parts of East Asia and the adjacent western Pacific Ocean ( $110^{\circ}\text{E} - 150^{\circ}\text{E}$ ,  $10^{\circ}\text{N} - 50^{\circ}\text{N}$ ) and an enlarged time period between April  
65 and August also including the initiation and withdrawal phases of the Baiu front. We employ event coincidence analysis (ECA) (Donges et al., 2016) to measure the synchrony of heavy rainfall events at different sites and use the associated similarity measure to construct functional climate networks (Odenweller and Donner, 2020; Wolf et al., 2020), two key topological properties of which are then thoroughly studied. Our corresponding analysis identifies two particular regions of synchronously occurring heavy rainfall events north and south of the Baiu front, the evolving mutual connectivity of which across the Baiu  
70 season is further studied by utilizing a sliding window approach. Finally, we discuss our complex network-based findings in the context of various meteorological variables characterizing different aspects of the atmospheric circulation in the study region.

## 2 Data and Methods

### 2.1 Data

For studying the spatio-temporal patterns of heavy rainfall events over East Asia, we employ daily rainfall estimates from the  
75 Tropical Rainfall Measurement Mission (TRMM, version 3B42 V7) (GESDISC (2016)), which are available on a  $0.25^{\circ} \times 0.25^{\circ}$  spatial grid between 1998 and 2018. We consider rainfall to be *heavy* if a corresponding daily value exceeds the 90th percentile of all daily values for a given grid point. This percentile provides a typical value used in previous studies on similar topics, which guarantees a sufficient number of events for proper statistical analysis while still focusing on a minority of days with extraordinary strong rainfall. Specifically, by proceeding as described we obtain the same number of heavy precipitation events  
80 in almost all grid point time series and only ignore dry spots, where an insufficiently low number of rainy days has been observed during the respective study period.

Instead of taking precipitation values for the entire year, for our analysis we only consider rainfall during a certain period, which we specify in the respective parts of Section 3. In each case, we select a proper time window and take the respective days of this window in every year into account. Thus, we stack all time series segments containing precipitation values of, e.g.,  
85 all days in April at each individual data point, while taking into account in our analysis (see below) that events from late April in one year cannot be dynamically related with events in early April of the following year.

In order to better understand the climatological background of the obtained precipitation pattern, we perform a complementary synoptic analysis based on the US National Center for Environmental Prediction – Department of Energy (NCEP-DOE)

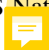

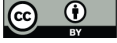

Reanalysis version 1 and 2 (Kalnay et al., 1996; Kanamitsu et al., 2002), in the following shortly referred to as R1/R2. R1/R2 are global reanalysis data sets with a  $2.5^\circ$  latitude/longitude resolution. The data sets cover the period from 1979 to the present. To match with the analysis of heavy rainfall from TRMM, the geopotential height, specific humidity, horizontal and vertical wind fields (and the derived relative vorticity) from R1 (daily data) and R2 (monthly data) within the period 1998-2018 are used. In addition, outgoing long wave radiation (OLR) from the US National Oceanic and Atmospheric Administration is examined as a proxy for convection.

## 2.2 Event Coincidence Analysis (ECA)

ECA (Donges et al., 2011, 2016) is a statistical method for investigating synchrony of events in pairs of time series, which has recently been applied for studying spatio-temporal climate variability patterns by means of a functional network approach as described below (Odenweller and Donner, 2020; Wolf et al., 2020). The method features two algorithmic parameters, the coincidence interval  $\Delta T$  and the time lag  $\tau$ , which allow disentangling the relevant timescales of (either instantaneous or lagged) event co-occurrence. Having identified the timings of the events of interest as described above, two events at grid points (locations)  $i$  and  $j$  that have been observed at time steps  $l$  and  $m$ , with associated observation times  $t_l^i$  and  $t_m^j$ , are considered to coincide with each other when their times of occurrence relative to each other fall within the (potentially lagged) coincidence interval as  $0 < (t_l^i - \tau) - t_m^j < \Delta T$ . To quantify the synchrony of two event time series, we compute the fraction of possible event coincidences that are actually observed, i.e., the so-called *event coincidence rate* (Odenweller and Donner, 2020)

$$r(i|j; \Delta T, \tau) = \frac{1}{s_j - s'_j} \sum_{m=1}^{s_j - s'_j} \Theta \left\{ \sum_{l=1}^{s_i} 1_{[0, \Delta T]}((t_l^i - \tau) - t_m^j) \right\}. \quad (1)$$

This rate gives the fraction of events at  $i$  that have been preceded by one or more events in  $j$ . In the above equation, we utilize the indicator function

$$1_I(x) = \begin{cases} 1, & \text{if } x \in I \\ 0, & \text{otherwise,} \end{cases} \quad (2)$$

and the left-continuous Heaviside step function

$$\Theta(x) \begin{cases} 1, & \text{if } x > 0 \\ 0, & \text{otherwise,} \end{cases} \quad (3)$$

to prevent double counting of paired events. In all analyses throughout this paper, we will set  $\tau = 0$  (i.e., we study instantaneous, non-lagged event co-occurrences only) and  $\Delta T = 3$  days as we may expect that 3 days are a period up to which co-occurring heavy rainfall events at different locations can be considered to be dynamically related given the governing atmospheric circulation patterns in the region of interest. It should be noted that Donges et al. (2016) originally introduced two different versions of event coincidence rates, among which we consider here only the so-called trigger rates (defined as described above) and ignore possibly slightly different results that could be obtained by applying the complementary precursor rates.



As a subtle yet important detail, in all computations of event coincidence rates events between  $t_f - \Delta T$  and  $t_f$  (with  $t_f$  being the last time point with observations available) have to be excluded to attain a proper normalization, since such events cannot precede any other events. In the stacked time series as described above, containing data of the same time period from different years, this applies to each continuous time series segment. We therefore determine  $s'_j$  by (Odenweller and Donner, 2020)

$$s'_j = \sum_{m=1}^{s_j} 1_{[t_f - \Delta T, t_f]}(t_m^j). \quad (4)$$

As we intend to investigate functional networks encoding event synchrony (see below) by means of ECA, we compute event coincidence rates for all pairs of grid point time series. From those, we construct a symmetric matrix  $Q_{ij}$  of pairwise similarity coefficients. Here, to symmetrize the two directional event coincidence rates  $r(i|j; \Delta T, \tau)$  and  $r(j|i; \Delta T, \tau)$ , we can either focus on strong unidirectional relationships by calculating the maximum of both rates (Odenweller and Donner, 2020)

$$Q_{ij}^{eca, max} = \max(r(i|j; \Delta T, \tau), r(j|i; \Delta T, \tau)), \quad (5)$$

or emphasize on general (bidirectional) relationships by computing the mean of both rates

$$Q_{ij}^{eca, mean} = \frac{r(i|j; \Delta T, \tau) + r(j|i; \Delta T, \tau)}{2}. \quad (6)$$

As a final note, we emphasize that previous related works (e.g., Ozturk et al., 2018, 2019) have employed a different event-based similarity measure called event synchronization strength (ESS), which is based on a similar rationale as our event coincidence rates (Quiroga et al., 2002). As recent studies have revealed, ESS provides systematically biased values in the presence of temporally clustered events, i.e., events recorded at subsequent time steps, which is not the case for ECA (Hassanibesheli and Donner, 2019; Odenweller and Donner, 2020; Wolf et al., 2020)). Moreover, selecting the parameter  $\Delta T$  of ECA allows to tailor the analysis to the specific situation under study and systematically trace the progression of heavy precipitation events through time and space (Wolf et al., 2020; Odenweller and Donner, 2020). According to those two features, we have chosen to utilize ECA in the course of the present work.

### 2.3 Functional network analysis

Functional network representations of multivariate data sets have been successfully used in different research areas and encode the position of strong statistical linkages between the different involved time series. In our case, we employ the corresponding framework by taking the matrix  $(Q_{ij})$  of pair-wise symmetrized event coincidence rates and transforming it into a binary matrix  $(A_{ij})$  by comparing each individual coefficient with a certain threshold value. In line with previous work (Ozturk et al., 2018, 2019), we choose that value globally such that the largest 5% of the symmetrized event coincidence rates are considered as strong, while the others are neglected, i.e.,  $A_{ij} = \Theta(Q_{ij} - Q^*)$  with  $Q^*$  being the global threshold value.

Based on the resulting adjacency matrix  $(A_{ij})$ , we identify each grid point (time series) with a node of a spatially embedded network and the presence (absence) of a strong relation (event-based similarity) according to the previously defined criterion, i.e.  $A_{ij} = 1$  ( $A_{ij} = 0$ ), as an indicator for the presence (absence) of a link between each pair of nodes. The spatial network

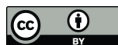

thus obtained, which we refer to as a *functional climate network*, therefore obeys a link density of  $\rho = 5\%$ , which is a common choice for this type of analysis (e.g. Malik et al., 2012; Wiedermann et al., 2017).

150 Complex networks like those defined as described above can be characterized by a multitude of local, mesoscale, and global characteristics (Donner et al., 2017). The possibly simplest one, the *degree*  $k_i$ , measures the number of links adjacent to node  $i$ ,

$$k_i = \sum_{j=1}^N A_{ij}. \quad (7)$$

155 While the degree is a purely topological network characteristic, more explicit spatial information is provided by the average link distance, i.e., the mean spatial distance (following geodesics on the sphere approximately describing the Earth's surface) from node  $i$  to all its connected neighbors  $j$ , i.e.,

$$d_i = \frac{1}{k_i} \sum_{j=1}^N A_{ij} d_{ij} \quad (8)$$

with  $d_{ij}$  being the spatial distance between nodes  $i$  and  $j$ .

160 In the setting considered in this study, the obtained functional climate networks are spatially embedded on a regular spherical grid, implying varying grid size. This means that different nodes can be representative of areas on the Earth's surface that have different sizes. To correct for the corresponding heterogeneity, we employ the framework of node-splitting invariance (n.s.i., Heitzig et al. (2012)), which introduces proper weights to each node. In case of the degree, the corresponding node-weighted counterpart is defined as

$$k_i^* = \sum_{j=1}^N w_j A_{ij}, \quad (9)$$

165 where  $w_i$  represents the n.s.i.-node weights (here, the cosine of the latitudinal coordinate of the associated grid point). In the remainder of this work, we will simply refer to the *n.s.i.-degree* as the *degree* and omit the corresponding distinction between both.

To further quantify the connectivity between subnetworks representing distinct regions, we calculate the *total cross-degree* as

$$170 \quad K^{m,n} = \sum_{i \in R_m} \sum_{j \in R_n} A_{ij} \quad (10)$$

where the sets of nodes  $R_m$  and  $R_n$  specify two subsets of nodes (e.g., corresponding to two regions of particular interest). For this total cross-degree, we neglect the effect of differently sized grid cells (which is likely not too large as we consider a tropical/subtropical study region sufficiently far from the poles).

175 Beyond the individual nodes' degrees and their distributions among subnetworks, the complex topology of networks often leads to regions within the network that are characterized by larger connectivity within a group of nodes than between these nodes and the rest of the network. Such subnetworks are called communities, and there are various approaches and algorithms



to split the set of nodes into such groups (Fortunato, 2010; Fortunato and Hric, 2016). Here, we are interested in communities that can consist of distinct spatially connected regions. To identify such subnetworks, we utilize the *Infomap* algorithm (Rosvall and Bergstrom, 2008), which is based on minimizing the description length of a trajectory of a random walker which jumps from node to node. Unlike other classical community detection methods based on the concept of modularity (Newman, 2006), this algorithm provides communities with the desired spatial structure. Specifically, for the functional climate networks studied in this work, several modularity-based algorithms have been tested as well, all of which resulted exclusively in spatially connected regions (not shown), which is most likely a result of the strong local connectivity in climate networks, reflecting the spatial autocorrelation of the underlying precipitation field (i.e., close grid points necessarily exhibit more similar dynamics than distant pairs).

Finally, we emphasize again that our functional climate networks are embedded on a regular spherical grid. In addition to the heterogeneous node density in space discussed above and addressed by means of the n.s.i. framework, the limited study area provides another source of biases to network properties due to inevitable boundary effects. To account for those effects, we follow here the algorithm described in Rheinwalt et al. (2012), utilizing 100 random surrogate networks with the same distribution of link distances as in the original network and normalizing the computed network characteristics in comparison with the mean values and standard deviations of their counterparts among the surrogate ensembles.

### 3 Results

#### 3.1 Full EASM season network pattern

Although the main goal of this study is to understand the temporal evolution of heavy rainfall events in the EASM domain, we first analyze a static network accounting for the complete EASM season (considered here as the period between 25 April and 3 August of each year), which was similarly studied in Ozturk et al. (2019) (however, utilizing ESS as a similarity measure instead of ECA). Going beyond this previous work, here we do not only greatly enlarge the study area spatially, but also investigate a longer period to capture the whole evolution of the Baiu season. To initially study the mean climatological setting, we show the mean and the 90th percentile of the daily rainfall sums in the study area in Fig. 1a,b. Next to ITCZ related heavy rainfall over the Philippines we observe a band of strong mean rainfall (Fig. 1a) with strong heavy rainfall (Fig. 1b) extending from Eastern China over Taiwan to the Japanese archipelago.

For our initial static network analysis, we are not specifically interested in directed connectivity patterns and, consequently, employ the *average-symmetrization* of the ECA. Figure 1c,d shows the resulting node degree and link distance pattern of the network. We particularly observe a region of elevated degree and link distance in the southernmost part of the study area, which is associated with the ITCZ that is gradually shifted northward during boreal spring. In addition, we observe a double-band structure composed of one region of high degree south of the Japanese main island of Honshu, which ranges from west of Okinawa to approximately 145°E and is clearly separated from another band of elevated degree over the Japanese Sea and Hokkaido.

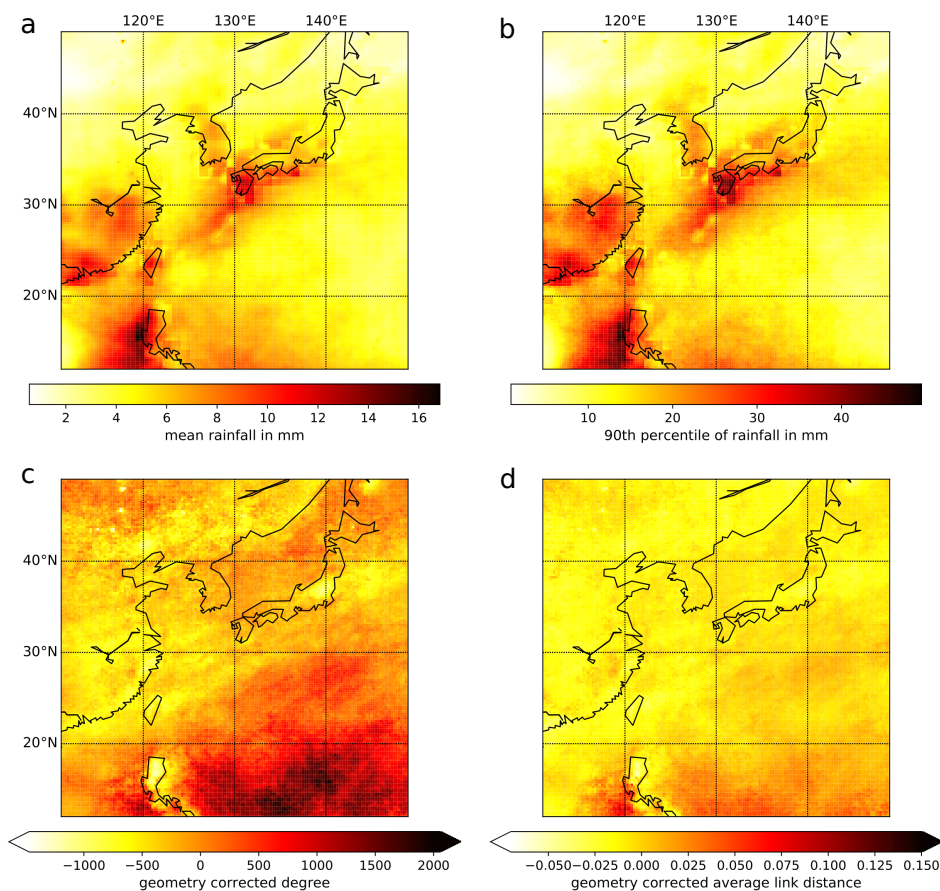

**Figure 1.** (a) Mean and (b) 90th percentile of daily rainfall sums between 25 April and 3 August over the study region. (c) Geometry-corrected degree and (d) average link distance of the climate network constructed based on synchronous occurrences of heavy rainfall events between 25 April and 3 August.

It is important to not confuse the observed double-band structure with the concept of dipole structures known from empirical  
210 orthogonal function analysis of climate variability, which would normally correspond by definition to regions that exhibit  
negative correlations instead of varying in-phase. Notably, correlation-based functional climate network approaches similar to  
that of the present work have also been used in the past for discovering previously overlooked dipole patterns in large-scale  
climate variability (Kawale et al., 2011), which is however distinctively different from what we attempt to achieve in the present  
work.

### 215 3.2 Monthly network patterns

In order to further study the temporal evolution of the network patterns uncovered above across the Baiu season and their  
connection with the intraseasonal dynamics of the EASM, we next examine the temporal evolution of the network structure over



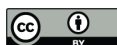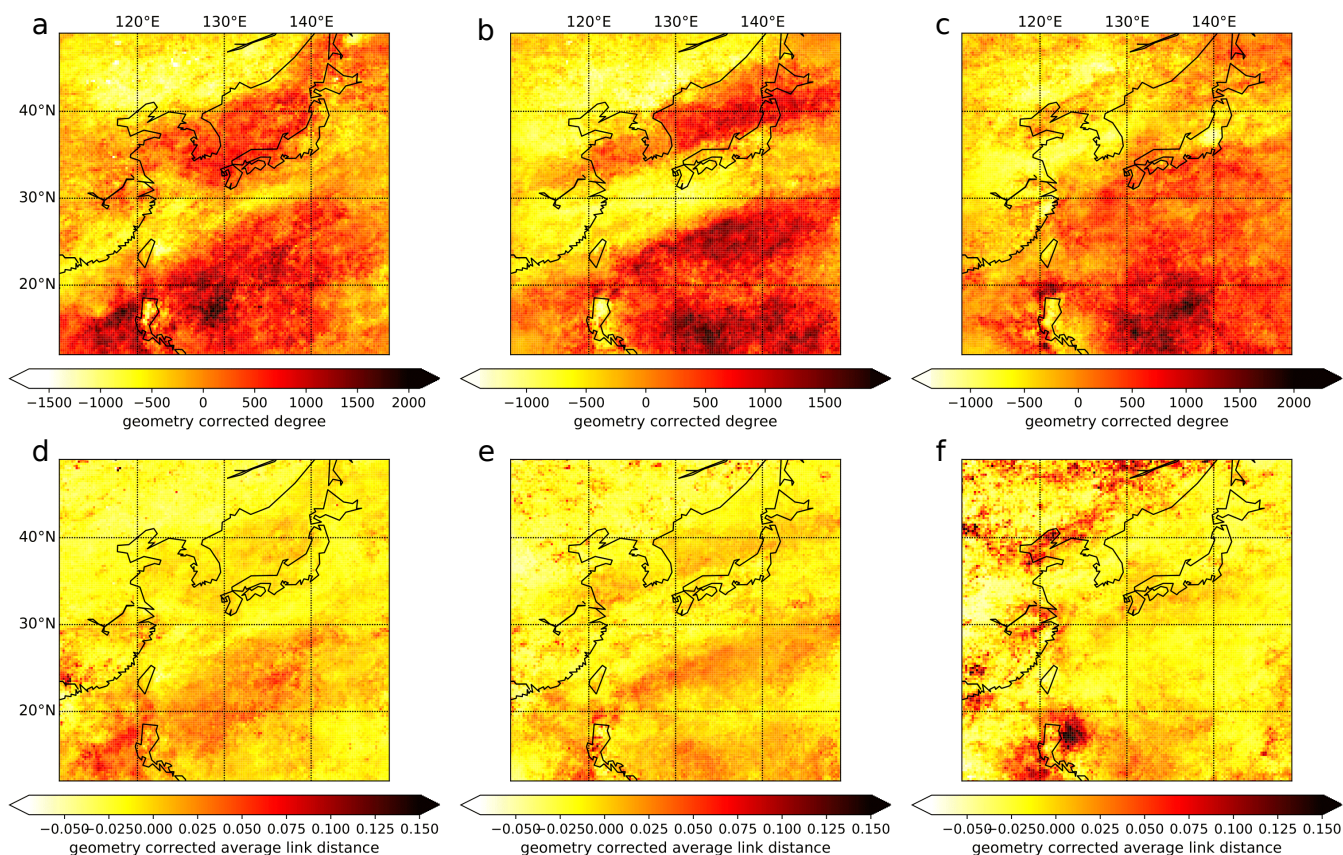

**Figure 2.** Network evolution during the active Baiu phase from May to July (left to right). Panels (a)-(c) show the degree patterns of the monthly networks, while panels (d)-(f) show the respective average link distance patterns.

the full Baiu season. For this purpose, we compute the spatial patterns of degree and average link distance for the functional network representations obtained when evaluating the data for each calendar month separately. Hence, we obtain distinct 220 networks for April, May, June, July, and August and show the resulting network patterns in Figs. 2 and 3. Specifically, the network characteristics of the main Baiu phase (May to July) are shown in Fig. 2, while those for the pre-Baiu (onset) and post-Baiu (withdrawal) phases (April and August, respectively) are shown in Fig. 3.

The top panels in both figures show the node degree of the different networks and unveil dynamic changes over the EASM 225 season. We confirm that the Baiu front is accompanied by a double-band structure of elevated degrees, with one band south of the front and another covering the Japanese Sea and the northern part of Honshu, which evolve over time and progressively migrate northward. This double-band structure, which is already visible in May in both degree and average link distance (Fig. 2a,d), is intimately related to the evolution of heavy rainfall associated with the Baiu front. In June, the corresponding pattern is most prominent (Fig. 2b,e), and a clear northward shift of the northern band is visible as compared to May. Also, the degree maximum of the southern band migrates northwestward and exhibits a clearer band structure in the average link

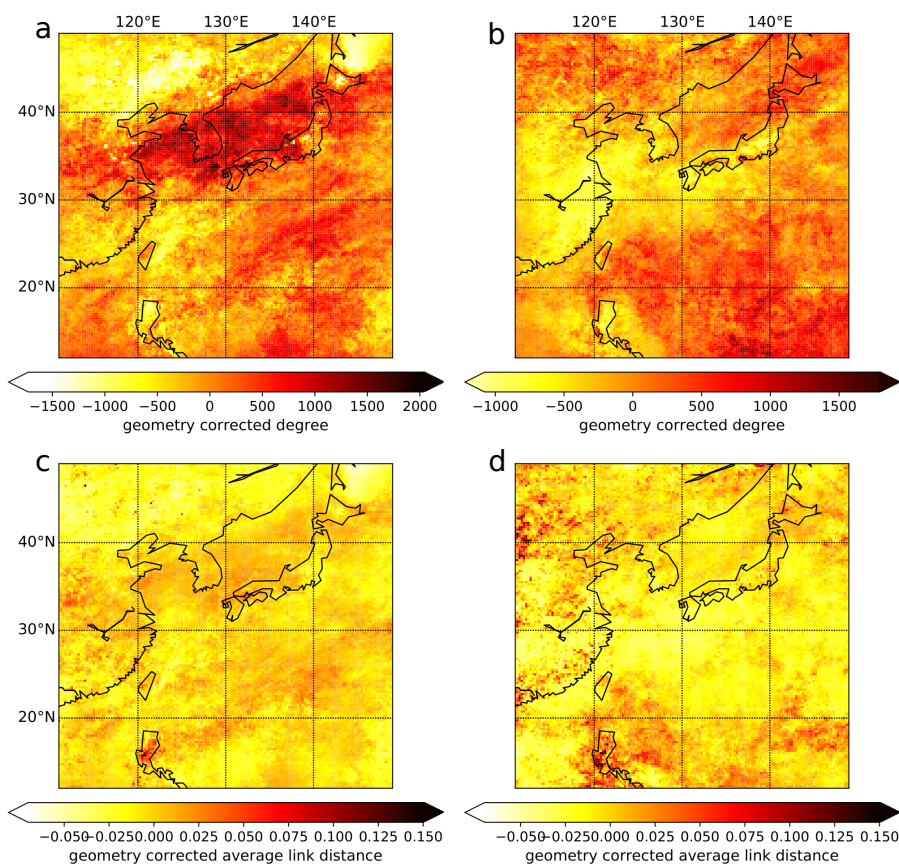

**Figure 3.** Network evolution before (April, panels (a) and (c)) and after (August, panels (b) and (d)) the active Baiu phase. (a,b) Geometry corrected node degree, (c,d) average link distance.

230 distance. This is in line with the development of the Baiu frontal system, which leads to the onset of the Baiu season over Honshu in early June. In July, the northern band with elevated degree is hardly recognizable anymore, while the southern band is further shifted northward, which is in good agreement with the further northward shift of the Baiu front in July (Fig. 2c). Interestingly, we observe a complete disappearance of the previously described link distance pattern (Fig. 2f). This observation is most likely caused by the disappearance of the northern high degree band and therefore the breakdown of the double-band structure (see Section 3.3 below).

235

To capture the full evolution of the Baiu system, we also examine the pre- and post-Baiu phases by analyzing the patterns of degree and average link distance (Fig. 3). In April, we initially observe the double-band as a rather diffuse pattern in both degree and average link distance, with no clear separation between the different regions, which is in agreement with the Baiu onset at the beginning of May for the Okinawa region. Finally, in August, the previously described remaining pattern of elevated node degrees associated with the southern band vanishes as well and is replaced by different structures possibly more strongly affected by tropical cyclone tracks.

240

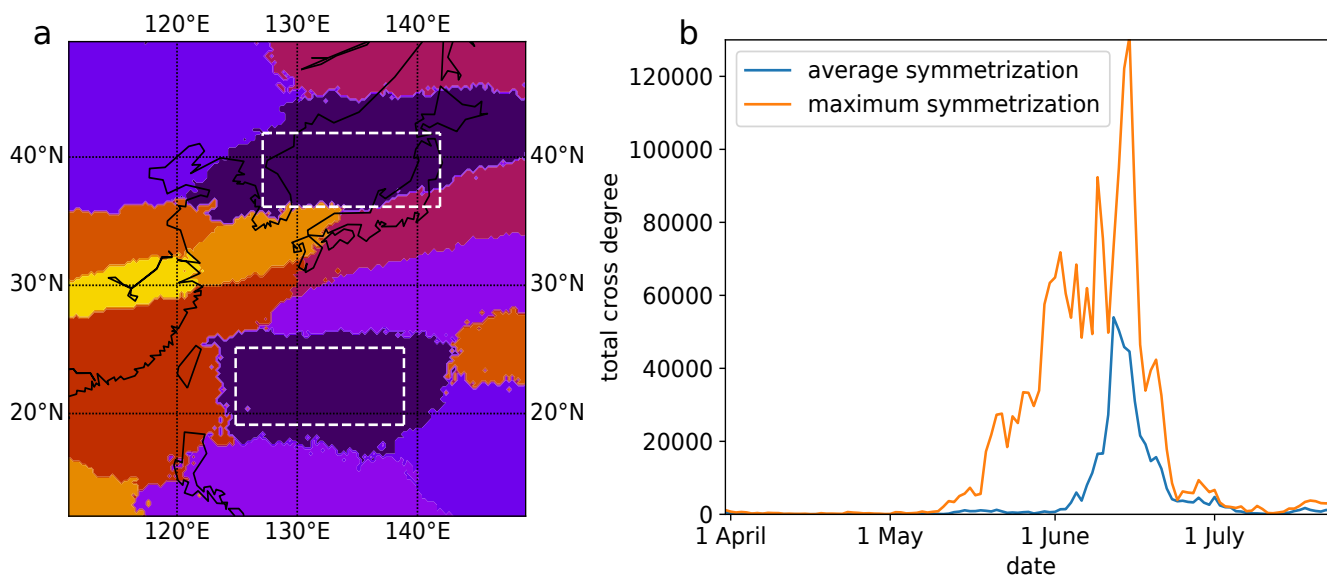

**Figure 4.** (a) Community structure of the network derived from heavy rainfall events between 14 June and 13 July of all years. (b) Total cross-degree between the regions marked by the white rectangles in (a) for 123 different networks computed from 30-day windows starting between 1 April and 1 August.

### 3.3 Evolution of the double-band structure

In an attempt to provide some climatological interpretation of the observed network structures, we next investigate the connectivity between the two observed high-degree bands and the role of the elevated average link distances in the respective regions. For this purpose, we first take a closer look at the community structure of the functional network representation covering a period between mid-June and mid-July. Specifically, in Fig. 4a we show the community structure of the network that we obtain when we only analyze the time series segments starting from 14 June and covering a period of 30 days in each year, using the average symmetrization of the event coincidence rates. Notably, we again observe the double-band structure, where one community (colored in dark purple) is split into two spatially distinct parts, reflecting the two areas previously identified as the northern and southern bands in Fig. 2. From this result, we can conclude that the double-band structure in June/July is indeed related to synchronous rainfall activity in two spatially distinct regions, which implies the existence of long-distance dependencies between the two bands and suggests that both structures do not originate from two isolated mechanisms. In addition, we also observe other communities consisting of different parts (Fig. 4a), which indicates that during the peak Baiu phase, heavy rainfall occurs synchronously also between other spatially distinct regions. As such regions are not characterized by outstanding values of node degree and average link distance in Fig. 2, we consider them here to be less climatologically relevant than the dark purple community representing our double-band pattern.

In order to further examine the general stability of the community pattern during the peak Baiu season, we have followed a cross-validation approach where five reduced datasets have been considered, each of which has been missing six years of



data (results not shown). In two out of the five cases, the community pattern looked almost indistinguishable from the one  
260 obtained for the full dataset. In two other cases, the more southern community was shifted southward, larger and separated  
from the northern one by an additional narrow community. Only one case did not exhibit a clear double-band community  
but two isolated communities representing comparable regions. Taken together, we conclude that the community structure  
provides some indication for the robustness of our double-band structure. In general, the concept of network communities is  
not uniquely defined, and it is known that community detection algorithms (including Infomap which features some stochastic  
265 optimization component) tend to exhibit a certain degree of instability in their results. In this spirit, we take the findings from  
our cross-validation exercise as a strong indicator for qualitatively robust patterns.

While the previously described analyses of the community structures have solely focused on the peak Baiu season, we also  
consider the temporal evolution of long-distance connectivity associated with the identified double-band community during  
the entire EASM season. It can already be expected from the spatial precipitation patterns which change dynamically along  
270 the season, that the obtained community structure is not stationary. To quantitatively trace the associated changes in the inter-  
connectivity between the two regions forming the distinct parts of the double-band community during the peak Baiu phase,  
we define two characteristic regions largely overlapping with that community during mid-June to mid-July (white boxes in  
Fig. 4a). Then, we pursue a sliding window approach by considering only corresponding time series segments of 30-day length  
from each year with observations, the starting date of which is successively shifted by one day from 1 April to 1 August. For  
275 each of the reduced datasets thus obtained, we generate a functional climate network representation as before, resulting in 123  
different networks. For each of those networks, we compute the total cross-degree between the two selected regions, the values  
of which are shown in Fig. 4b.

Figure 4b reveals several features associated with the double-band structure. First, we observe a rapidly increasing total  
cross-degree between the two regions for time windows starting after 9 May in case of the maximum symmetrization of the  
280 ECA, which exhibits a distinct maximum for windows starting around the mid of June. Second, we find a delayed increase  
of the total cross degree for the average symmetrization visible only for windows starting after 3 June, also peaking for time  
windows starting in mid-June. The second finding appears consistent with the mean onset date of the Baiu over **Honshu**.  
The earlier signal in case of the maximum symmetrization can be either related to the earlier onset of the Baiu in the region  
between **Okinawa** and **Honshu** or represents a direct precursor of the bidirectional synchronization of the heavy rainfall events  
285 developing in the course of the peak Baiu phase. Both aspects would suggest the existence of a physical mechanism that  
couples the respective regions in a time-dependent manner and thereby potentially affects the onset and progression of the  
Baiu season. The differences between the two different symmetrization approaches suggest that there is some kind of directed  
synchronization between the two regions after the onset of the Baiu in the Okinawa region, which gradually transforms into a  
more symmetric (bidirectional) one as soon as the Baiu related coherent heavy rainfall activity hits **Honshu** island.

### 290 3.4 Inter-band synchrony of heavy rainfall events

From our initial analysis of the common climatological patterns, it already follows that most of the heavy rainfall associated  
with the Baiu front falls at the actual position of the front which typically lies above **Kyushu and Honshu** from mid-June to

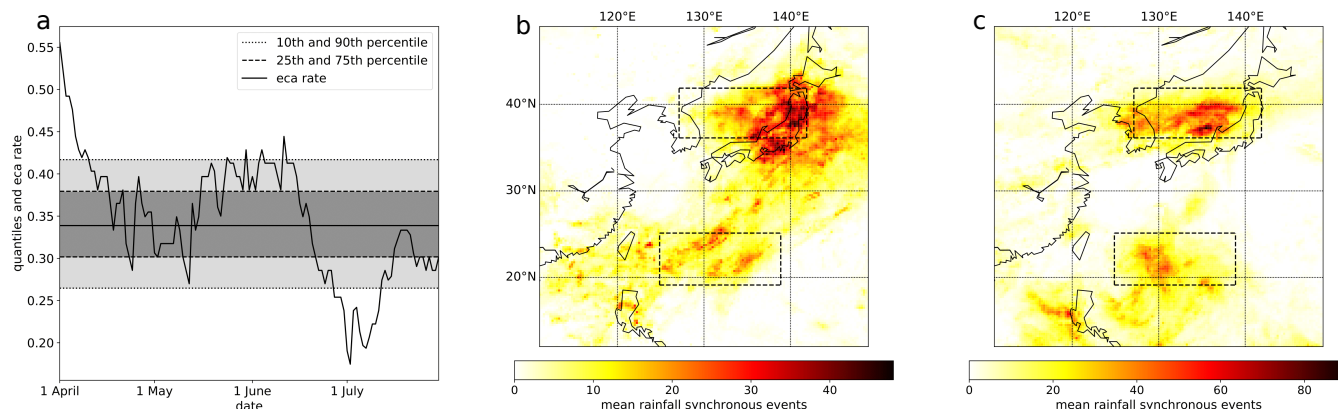

**Figure 5.** (a) Event coincidence rates between the days with the 10% most synchronous events in both regions of interest (Fig. 4a) for the same sliding windows as in Fig. 4(b). Different shadings represent the corresponding quantiles (0.1, 0.25, 0.75, 0.9) estimated from 1000 surrogate event sequences constructed from the underlying ones by random shuffling of the events. (b), (c) Rainfall composites for those days on which the number of heavy rainfall events exceeds its empirical 90th percentile in both regions during the periods (b) 4 April–3 May and (c) 14 June–13 July, respectively.

**Table 1.** Days with high numbers of grid cells exhibiting heavy precipitation events in the two regions of interest during phase 1 (4 April–3 May, left) and phase 2 (14 June–13 July, right) that have been used for defining the composites shown in Fig. 5b and c, respectively. The numbers of grid points in the two regions of interest (and therefore the maximum possible number of grid points with events per day) are 1375 for the northern region and 1344 for the southern region, respectively.

| date          | #events northern band | #events southern band | date         | #events northern band | #events southern band |
|---------------|-----------------------|-----------------------|--------------|-----------------------|-----------------------|
| 14 April 1998 | 467                   | 789                   | 9 July 2002  | 740                   | 717                   |
| 12 April 1999 | 657                   | 1069                  | 13 July 2002 | 865                   | 478                   |
| 25 April 2009 | 862                   | 409                   | 18 June 2004 | 729                   | 471                   |
| 3 May 2012    | 527                   | 429                   | 22 June 2011 | 925                   | 452                   |
| 6 April 2013  | 1168                  | 624                   | 17 June 2013 | 664                   | 597                   |
| 14 April 2015 | 712                   | 573                   | 10 July 2013 | 443                   | 708                   |
|               |                       |                       | 11 July 2013 | 511                   | 764                   |
|               |                       |                       | 5 July 2016  | 629                   | 719                   |

mid-July (Fig. 1a,b). This implies that the heavy rainfall events over the identified double-band structure do not necessarily correspond to the highest overall rainfall sums across the study area. In order to better understand the synchrony between heavy rainfall in the two bands, we now take a closer look at the situations corresponding to the synchronous heavy rainfall events in both bands.

To identify those time periods that most likely dominate the specific signatures in the climate network properties described above, we consider the number of grid cells in the two previously defined regions of interest (Fig. 4a) for single days based



on each 30-day window. This results in two new time series representing the respective numbers of events in both regions.  
300 From those event number series, we again consider the 90th percentile to define those days where the highest numbers of grid points synchronously exhibit heavy rainfall events. To tie in with the previous network analysis, we subsequently calculate the instantaneous event coincidence rate ( $\tau = 0, \delta T = 3$  days) between the two event number time series for each of the 30-day windows used in the previous analysis. Similar as for the total cross degree between both regions studied in Section 3.3, this results in a time series of event coincidence rates for different windows, which is shown in Fig. 5a together with selected  
305 quantiles of a corresponding distribution of event coincidence rates drawn from random event sequences (1000 independent samples) with the same series length and number of events.

Figure 5a reveals two distinct phases of synchrony between spatially extended heavy rainfall activity in both regions of interest (high event coincidence rates) and one phase of effective **anti-synchrony** (extraordinary low event coincidence rate). Notably, the latter period of anti-synchrony does not coincide with a phase of high cross-degree in the network representation  
310 and indicates that during this phase, spatially extended heavy rainfall in one region effectively suppresses (rather than promotes) corresponding events in the other, and vice versa. This means that synchronous large-scale heavy rainfall events in both regions co-occur less frequently than expected for random sequences, which is a finding that might deserve special attention in future works, but will not be further analyzed here since it corresponds to a time period that is likely more strongly affected by tropical cyclones than the developing and peak Baiu phase). Here, we are mainly interested in better understanding the constructive  
315 synchrony between both bands. Therefore, in what follows we will focus on the two corresponding periods, one associated with time windows starting at the beginning of April and the other coinciding with the period of elevated total cross-degree between both regions in the developed Baiu phase.

To illustrate the key mechanisms leading to wide-spread simultaneous heavy rainfall events in both regions, we show composites of daily rainfall sums from days with **particularly high “activity”** in both regions during both periods (Fig. 5b,c). Both  
320 panels focus on those days for which we observe heavy rainfall events occurring simultaneously in both regions, which are listed in Tab. 1. Specifically, only those days are used here at which the number of grid points with heavy rainfall events exceeds their respective 90th percentile simultaneously in both regions. Although both composites are, therefore, based on data from a few days only (phase 1: 6 days, phase 2: 8 days), we observe some distinct climatic patterns leading to the elevated event coincidence rates. In phase 1 (Fig. 5b), which is particularly prominent in the 30-day period starting 4 April, heavy rainfall is  
325 caused by a major large-scale weather system extending over both regions and the area between them. In phase 2 (Fig. 5c), which coincides with the fully developed Baiu phase over **Kyushu and Honshu**, we rather observe two spatially separated systems with heavy rainfall (here shown for the time window starting on 14 June). Only the latter configuration is characterized by an elevated cross-degree, since both contiguous heavy rainfall patterns fully fall into the separated regions, while other areas are far less affected by heavy rainfall, which is the major difference to the configuration in phase 1. This result is representative  
330 for other time windows with elevated event coincidence rates (not shown).

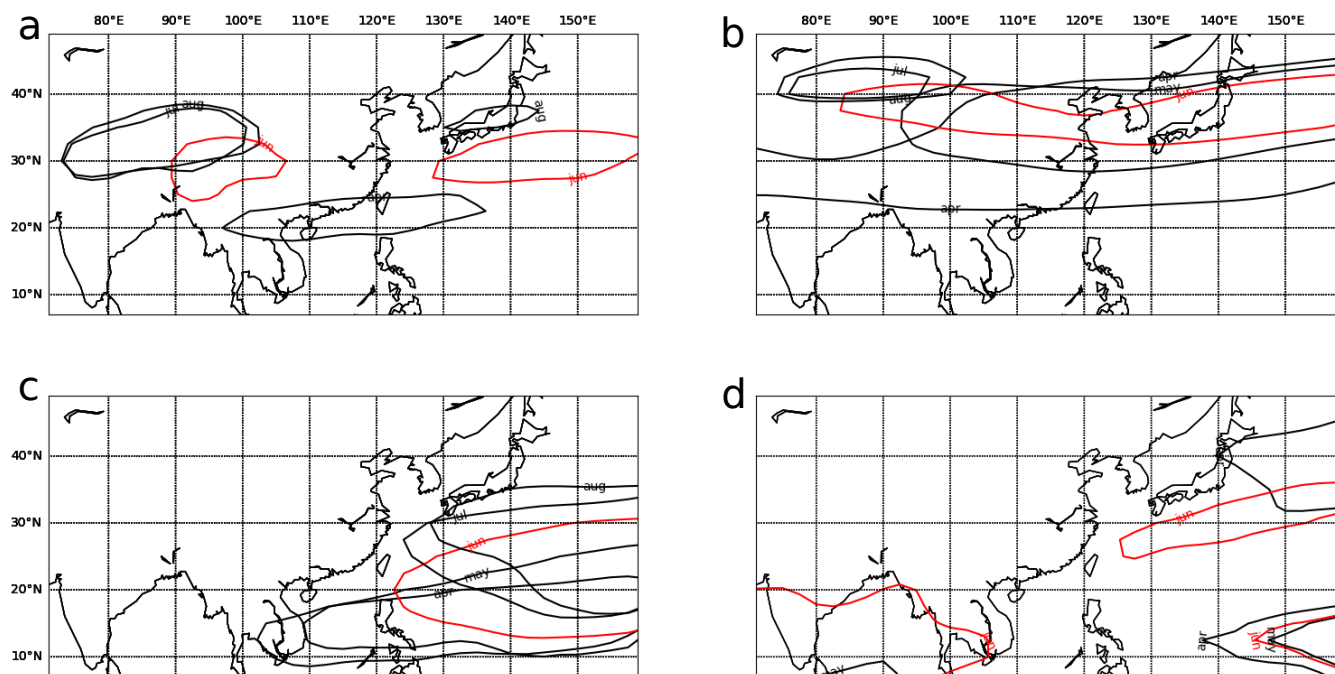

**Figure 6.** Monthly mean contour of (a) 200 hPa relative vorticity at  $2.8 \cdot 10^{-5} \text{ s}^{-1}$ , (b) 200 hPa isotachs of  $30 \text{ ms}^{-1}$ , (c) 500 hPa geopotential height at 5880 m, and (d) 850 hPa isotachs of  $7 \text{ ms}^{-1}$  during April-August. Contours in June are colored red.

## 4 Discussion

### 4.1 Climatological controls on Baiu dynamics

The results of the network analysis presented in Section 3 have been solely based on heavy rainfall events in the considered study area. In order to link the observed spatio-temporal patterns of synchronous heavy precipitation with large-scale atmospheric processes that are more directly reflected by other climate variables, we take an additional look at the associated geopotential height, relative vorticity, and high altitude and low-level wind fields in terms of their mean climatology across the EASM spatial domain and season.

The development of the Baiu front and associated rainfall is well-known to have a close relationship with the EASM (Chen, 1994). While Baiu is often associated with the frontal development over southern China (as Meiyu) and Taiwan, the Baiu onset time usually coincides with that of the EASM. Moreover, the active Baiu season with intense rainfall is associated with increased moisture transport by south-westerlies in the EASM domain. Several studies have also revealed that the formation of the Baiu front over the Yangtze River valley region in China as well as Japan is correlated with the onset of the ISM, and have demonstrated that at both, intraseasonal and interannual timescales, the precipitation in Kerala, India (commonly used for defining ISM onset) is significantly correlated with that in the Baiu region through the so-called southern mode of teleconnection (Krishnan and Sugi, 2001; Liu and Ding, 2008; Li et al., 2018).



In the context of this teleconnection mode, the South Asian Anticyclone (SAA) plays an important role. Li et al. (2018) indicate that the intensity of the SAA is correlated with the upper-level jet from the Tibetan plateau to the Baiu region, which is known as a favorable factor for the frontal development. Climatologically, the upper-level relative vorticity during April and May is weak over the South and East Asian continent. The SAA first appears in June and further extends during July and August (identified as relative vorticity of the order of  $3 \cdot 10^{-5} \text{s}^{-1}$ , see Fig. 6a). The SAA is also part of the zonally oriented upper-level wavetrain of an cyclone-anticyclone-cyclone pattern identified in the study of Krishnan and Sugi (2001). The cyclone to its east is responsible for the upper-level jet into the Baiu region. When the SAA develops during June the upper-level jet extends from the SAA to the Baiu development region through a latitudinal band at about  $35^{\circ}\text{N}$  to  $40^{\circ}\text{N}$ , which is remarkably narrow when compared with that existing in April and May (Fig. 6b). During July and August, this jet retreats to the west. Interestingly, Li et al. (2018) also demonstrated that an intense SAA is consistent with a strong upper-level meridional temperature gradient over southern Japan, which may be related to the midlevel temperature advection during early June reported by Okada and Yamazaki (2012) as well as the large meridional temperature gradient analyzed in Tomita et al. (2011).

Also relevant to the Baiu development, but commonly considered independent of the SAA (correlation coefficient of 0.02 estimated by Li et al. (2018)) is the Northwest Pacific Subtropical High (NPSH). At higher altitudes, the NPSH is characterized by a stable low-pressure system that provides the strong upper-level westerly jet south of Japan. The westerlies north of the ridge of the NPSH reach down to the low levels at about the same latitudes (Liu and Ding, 2008) and thereby provide the pre-frontal winds for the Baiu development. Climatologically, the NPSH develops at higher latitudes outside the tropics during June (Fig. 6c). During that month, the northern boundary of the NPSH is at about  $30^{\circ}\text{N}$  and thus the westerlies north of the ridge are located just south of Japan. During July and August, the average ridge expands further to the North, which is consistent with the northward migration of the Baiu front. Compared with the pre-Baiu period of April–May, it is also only in June that the strong westerly belt associated with the NPSH extends from the position of the NPSH in the Pacific Ocean to almost the western coast of the Pacific near Taiwan (Fig. 6d), which provides a favorable wind structure for frontal development.

Considering all observations mentioned above, we suspect that the north-south double-band structure as clearly depicted in the network measures of node degree and average link distance especially during June is a representation of two previously assumed independent factors responsible for the Baiu development: the SAA as part of the coupled ISM and EASM system, and the NPSH that develops over the Pacific Ocean. The synchrony between heavy precipitation events likely controlled by both mechanisms therefore indicates a dynamical coupling between SAA and NPSH that has not been described previously to our best knowledge. We emphasize, however, that our analysis has focused on specific events, while previous work on Baiu dynamics and related phenomena has almost exclusively utilized standard (linear) analysis techniques based on correlations or composites commonly applied to other atmospheric variables (among other reasons, a statistically rigorous evaluation of correlations for daily precipitation data is complicated by the commonly large number of zeros, cf. Ciemer et al. (2018)). Therefore, it is possible that the hypothesized coupling might not act persistently, but rather intermittently during specific large-scale synoptic situations. A more in-depth investigation on this aspect is outlined as a subject of future research.



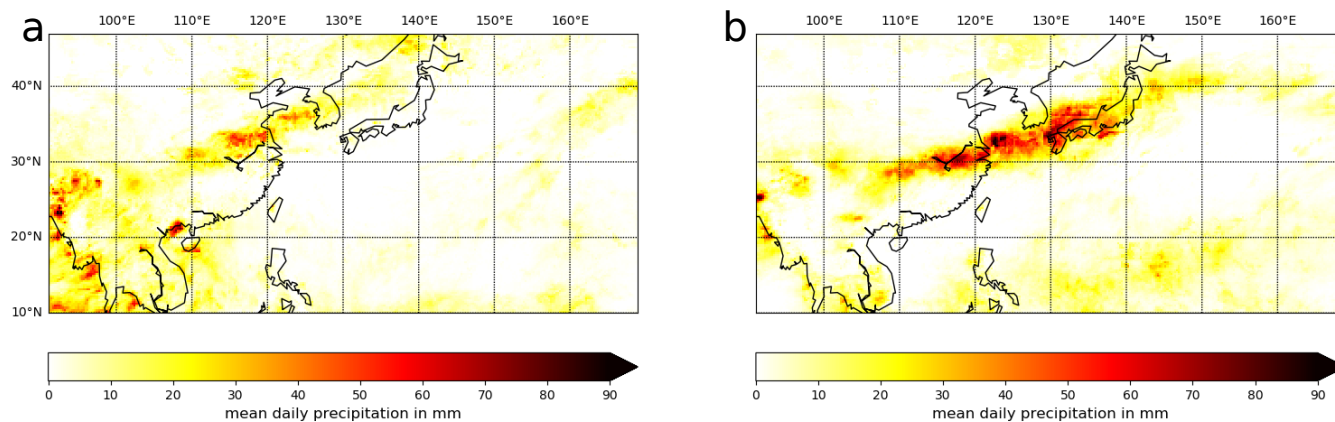

**Figure 7.** Mean daily precipitation (a) between 29 June and 3 July 1998 and (b) between 25 and 30 June 1999.

#### 4.2 Illustrative examples: 29 June–3 July 1998 and 25–30 June 1999

380 To further illustrate the atmospheric processes associated with Baiu development, two cases previously analyzed by Guan et al.  
(2020) are considered in more detail. Guan et al. (2020) termed the southwest-to-northeast development of the Baiu front as a  
corridor of rainfall. Interestingly, they also identified a double-band structure of synoptic factors facilitating the development  
of severe rainfall at the front. The first two years of our study period (1998/1999) are among the particularly active Baiu years  
and clearly highlight the driving synoptic processes. For example, during the period between 29 June and 3 July 1998, it can  
385 be seen that severe rainfall occurred in the Bay of Bengal and extended to northeastern China through the frontal rainfall band  
(Fig. 7a). Between 25 June and 30 June 1999, the Baiu rain-band extended more to the east and covered substantial parts of  
Kyushu and Honshu (Fig. 7b).

The double-band structure found by Guan et al. (2020) consists of a north–south pair of anticyclone and cyclone at low level,  
which the authors referred to as the Tropical Anomalous Anticyclone (TAAC) and the Midlatitude Anomalous Cyclone (MAC),  
390 respectively. From their interannual variability analysis, it is evident that the MAC/TAAC pair was strongly developed in June  
1998 (Fig. 8a) with strong south-westerlies driving the cyclonic flow to the north. The anticyclone in the south originated from  
the NPSH shown in Fig. 6. Associated with this double-band, there was a significant meridional gradient of geopotential height  
(Fig. 8b). At the same time, the upper-level jet with wind speed over  $35 \text{ ms}^{-1}$  was driving the convection at the frontal surface.

As opposed to the former case, in the event of June 1999, the TAAC was similar to the year before while the MAC was not  
395 as strong (Fig. 8c). In addition to the dynamic factors, moisture related processes are important to organize the convection at  
the frontal surface. In the case of 1999, moisture was abundant in vast areas in eastern South Asia. Along the south-westerlies  
extending from the northern side of the NPSH (or TAAC), updraft existed at the low-to-mid level, which is a key dynamic factor  
to organize convection (Tan et al., 2015). Considering the main moisture source being located over southern Asia, advection is  
the major process to transport the moisture into the frontal zone, with a weak convergence flow over southern Japan enhancing  
400 the convection at the front (Fig. 8d). In comparison with the frontal rain bands in Fig. 7, it is evident that the moisture transport

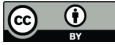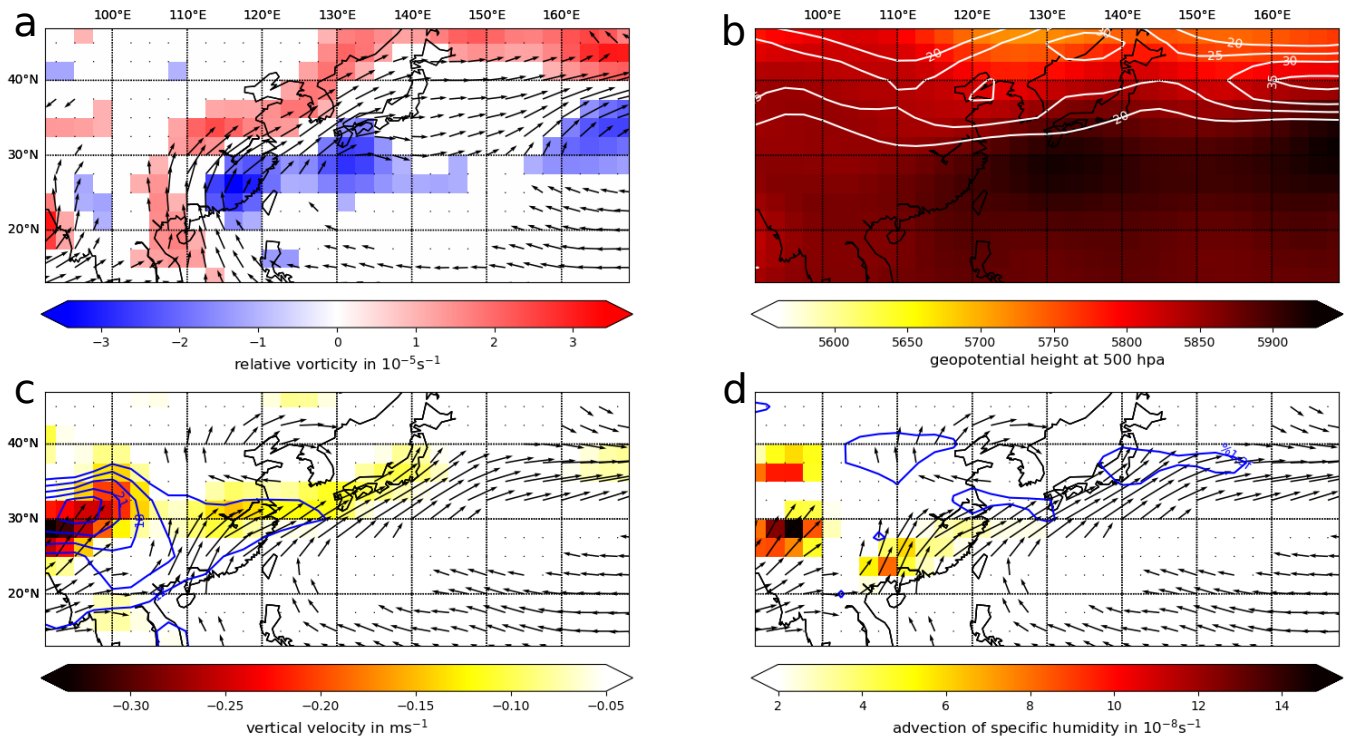

**Figure 8.** (a) Average (29 June–3 July 1998) 850 hPa winds with speed larger than 5 ms<sup>-1</sup> and relative vorticity larger than 10<sup>-5</sup> s<sup>-1</sup> (red tones) and smaller than -10<sup>-5</sup> s<sup>-1</sup> (blue tones). (b) Average (29 June–3 July 1998) 500 hPa geopotential height (shaded) and 200 hPa wind speed larger than 20 ms<sup>-1</sup> (white contours). (c) Average (25–30 June 1999) 850 hPa winds with speed larger than 5 ms<sup>-1</sup>, specific humidity larger than 12 g kg<sup>-1</sup> (blue contour, interval 3 g kg<sup>-1</sup>) and 700 hPa updraft vertical velocity larger than 0.05 Pa s<sup>-1</sup> (shaded). (d) Winds as in panel (c), but combined with specific humidity advection larger than 2 × 10<sup>-8</sup> s<sup>-1</sup> (shaded) and divergence at -0.01 ms<sup>-1</sup> (i.e., convergence, blue contour).

by the south-westerlies associated with the MAC enhances the convection at the Baiu front. To the south, since the TAAC is associated with a high-pressure system, rainfall has been suppressed over that region. Nevertheless, the southern band in our network analysis has revealed strong synchrony of heavy rainfall there likely due to a control by the TAAC.

### 4.3 Synoptic patterns of days with strong inter-band activity

405 To further clarify the formation of the double-band structure in the climate network, we study composites of different climatological variables (Fig. 9) corresponding to the same days (see Tab. 1) as used for the rainfall composites in Fig. 5c, which are closely connected to the elevated cross-degree in the network in the period from mid-June to mid-July.

The relative vorticity (Fig. 9a) highlights the role of the NPSH (blue shading) and the corresponding clockwise rotating low-level winds, leading to the rainfall associated with the southern band. The NPSH related elevated values of geopotential

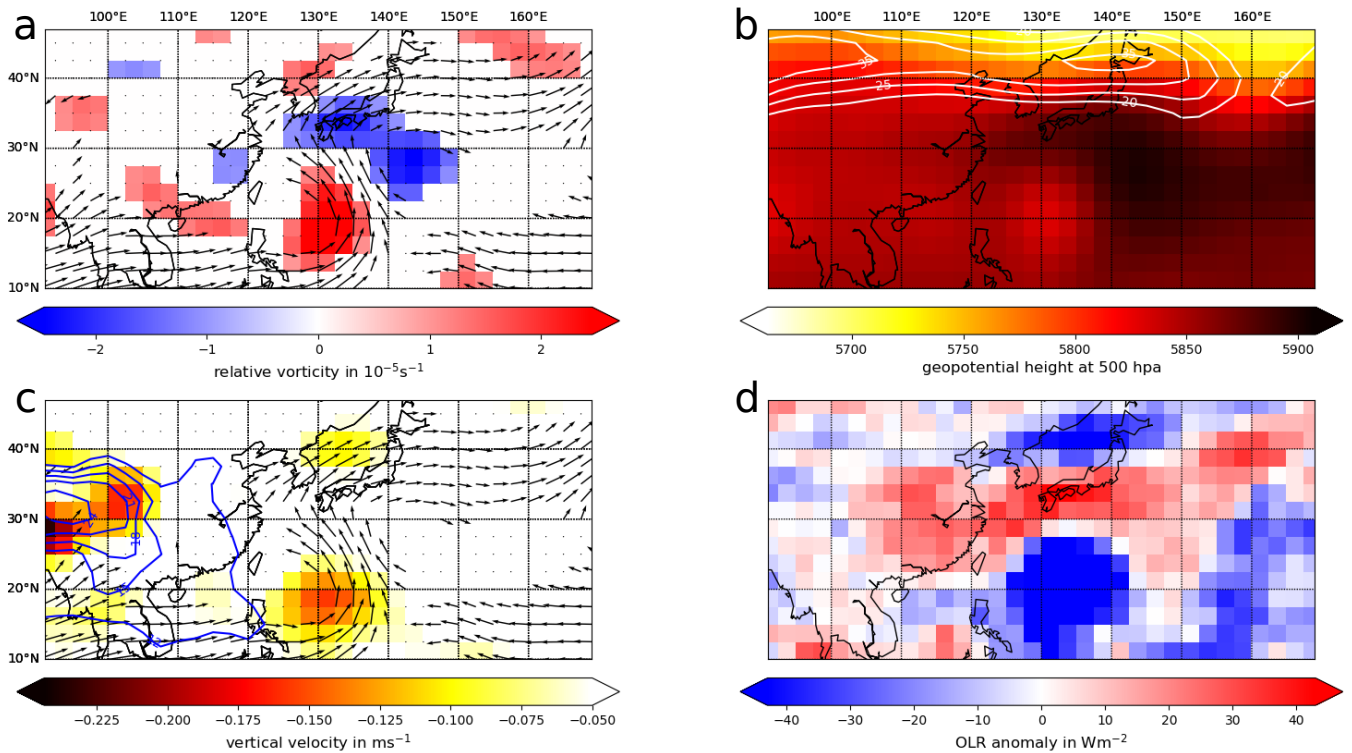

**Figure 9.** Composites based on the dates with strong inter-band activity (see Fig. 5c and table 1). (a) Average 850 hPa winds with speed larger than  $5 \text{ ms}^{-1}$  and relative vorticity larger than  $10^{-5} \text{ s}^{-1}$  (red tones) and smaller than  $-10^{-5} \text{ s}^{-1}$  (blue tones), (b) Average 500 hPa geopotential height (shaded) and 200 hPa wind speed larger than  $20 \text{ ms}^{-1}$  (white contours). (c) Average 850 hPa winds with speed larger than  $5 \text{ ms}^{-1}$ , specific humidity larger than  $12 \text{ g kg}^{-1}$  (blue contour, interval  $3 \text{ g kg}^{-1}$ ) and 700 hPa updraft vertical velocity larger than  $0.05 \text{ Pa s}^{-1}$  (shaded). (d) OLR anomalies with respect to the NOAA long term mean between 1981-2010.

410 height are depicted in Fig. 9b together with the 200 hPa wind speed, showing the SAA related jet closely associated with the northern rainfall band in the Japanese Sea.

Matching with the two regions of spatially coherent distant rainfall, we observe two spatially separated regions of strong updraft, which appear to be connected by the mentioned low-level winds (see Fig. 9c). To investigate the updraft-induced cloud formation, we also show the outgoing longwave radiation (OLR) anomalies in Fig. 9d. The pattern shown by the OLR anomaly  
415 during the selected days is very similar to that of the rainfall composite in Fig. 5c, as well as the network measures, and shows negative values connected with enhanced cloud formation in both regions which are linked in the network. Specifically, the southern band is characterized by very low OLR values, which provides an indication for tropical deep convection, while the generally somewhat larger values in the northern band indicate that the convective rainfall in this region rather originates from extratropical processes.



#### 420 4.4 Insights and perspectives of network analysis

Utilizing our network analysis, we have identified a double-band structure of synchronous heavy rainfall events along the Baiu frontal zone, with the northern band most likely resulting from the upper-level jet originating from the SAA and the southern band representing the low-level jet emanating from the NPSH. Both bands form a single network community persisting during the active Baiu phase (Fig. 4), which demonstrates that the two major (but commonly considered independent) synoptic factors  
425 for Baiu development are intimately linked as manifested in the single system variable heavy rainfall. In other words, during Baiu development the heaviest rainfall events north and south of the front are synchronized with a spatial pattern that is distinct in its characteristics as compared to the pre- and post-Baiu periods. This suggests a potential mechanism that could provide a novel approach for developing a predictor scheme for Baiu onset based on network measures, which should be further explored in future studies.

430 For a dynamical model-based prediction of the onset dates of Baiu, but also the closely associated ISM onset dates (Liu and Ding, 2008; Li et al., 2018), the ability of a model to simulate the SAA and the NPSH over the Pacific (and likely also the associated mesoscale convective systems) would affect the prediction skill. The observed double-band structure associated with heavy rainfall north and south of the Baiu front, which to our best knowledge has not been described before, could aid evaluating such dynamical models. Moreover, the mechanism for its generation as discussed above could be further exploited  
435 to provide a potential predictor for improved statistical forecasting schemes. Notably, a predictor considering the synchrony revealed by the community structure would complement any prediction based on ISM or SAA alone, because the largest community identified by our network analysis comprises the synoptic influence from the Pacific Ocean as well. Although evidence has to be further identified, many years in which the onset date of Baiu was quite different from that of the ISM have been El Niño years (Liu and Ding, 2008). Thus, processes from the Pacific Ocean likely constitute critical factors for Baiu  
440 development. Nonetheless, only the mean seasonal evolution of the Baiu has been analyzed in this study, and therefore, the presented methodology should be further extended to be able to analyze interannual variability before any improvement on Baiu prediction can be attempted.

## 5 Conclusions and Outlook

In this study, we have investigated the temporal evolution of heavy rainfall patterns related to the East Asian Summer Monsoon  
445 (EASM). Specifically, we have investigated the timing of heavy rainfall events across the monsoon season by utilizing functional climate networks along with event coincidence analysis and have found a previously not reported double-band structure of two spatially distinct regions with synchronous heavy rainfall, the emergence of which appears intimately linked with the onset of the Baiu over Japan.

To extend previous static network-based analyses of Baiu related rainfall (Ozturk et al., 2018, 2019), we have studied the  
450 evolution of heavy rainfall event-based synchrony patterns over time by utilizing a sliding window approach. For time windows of 30 days successively shifted over the period of the EASM from April to August, we have constructed functional climate networks and have characterized the formation and breakdown of a double-band structure, which is visible from the beginning



of May to the end of July in the node degree and average link distance patterns of the respective networks. In addition, we have shown, that the interconnectivity between the two distinct regions forming this double-band emerges in a complex manner, which is characterized by a directional synchrony pattern emerging with the beginning of the Baiu season in the Okinawa region (mid-May) that tends to develop into a bidirectional relationship at about the time when the Baiu front hits Honshu island in June. We have confirmed this finding by investigating the community structure of the network and have shown that the double-band is, during the peak Baiu phase, indeed represented by a unique spatially split community consisting of two distinct contiguous regions synchronously experiencing heavy rainfall.

We have further shown, that the northern band is related to the upper-level jet triggered by the South Asian Anticyclone while the southern band emerges due to the low-level jet resulting from the Northwestern Pacific Subtropical High. As our network analysis has revealed the bidirectional dependence of heavy rainfall related to the two different drivers and that the associated temporal evolution is intimately connected with the onset of the Baiu, we suggest that our findings can contribute to future developments of complementary predictors of Baiu onset based on the identified event synchrony patterns.

Finally, we emphasize that our synoptic analysis has linked the observed double-band structure to two different drivers that have been previously assumed to serve as independent actors in East Asian summer monsoon dynamics. The observation that two associated outstanding regions north and south of the Baiu front are characterized by synchronous heavy rainfall activity may have two possible explanations: either a common driver behind the corresponding processes controlling precipitation dynamics in both regions or a previously disregarded mutual coupling between their respective drivers. In order to reject any of those two possible hypotheses, the more qualitative synoptic analysis performed here needs to be further extended into a quantitative one, going beyond a purely correlative study by explicitly accounting for possible directional cause-effect relationships. Corresponding follow-up investigations using novel tools of statistical climatology like causal effect networks or response guided causal precursor detection (Runge et al., 2015; Kretschmer et al., 2016; Di Capua et al., 2020) are therefore outlined as relevant topics for future work.

*Code and data availability.* All analyzed datasets are freely accessible. The TRMM data set can be obtained from <https://pmm.nasa.gov/data-access/downloads/trmm>, while the NCEP reanalysis data sets can be found at <https://www.esrl.noaa.gov/psd/data/gridded/data.ncep.reanalysis.html> and <https://www.esrl.noaa.gov/psd/data/gridded/data.ncep.reanalysis2.html>. The OLR data set is freely available at [https://psl.noaa.gov/data/gridded/data.interp\\_OLR.html](https://psl.noaa.gov/data/gridded/data.interp_OLR.html). Network construction and computation of network measures have been performed utilizing the python package *pyunicorn* (Donges et al. (2015), <http://www.pik-potsdam.de/~donges/pyunicorn/download.html>).

*Author contributions.* All authors contributed to the design of the study. FW and KC analyzed the data. FW implemented the network analysis. All authors analyzed the results and wrote the manuscript. All authors read and approved the final manuscript.

*Competing interests.* The author declare no competing interests.

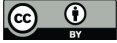

*Acknowledgements.* This work has been financially supported by the IRTG 1740/TRP 2011/50151-0 (funded by the DFG and FAPESP) and by the German Federal Ministry for Education and Research of Germany (BMBF) via the BMBF Young Investigators Group CoSy-CC<sup>2</sup>:  
485 Complex Systems Approaches to Understanding Causes and Consequences of Past, Present and Future Climate Change (grant no. 01LN1306A),  
the Belmont Forum/JPI Climate project GOTHAM (grant no. 01LP16MA) and the JPI Climate/JPI Oceans project ROADMAP (grant no.  
01LP2002B). UO is supported by the German Academic Exchange Service (DAAD) within the Co-PREPARE project of the German-Indian  
Partnerships Support Program (Project No: 57553291). We would like to thank Dr. Krishnan Raghavan (IITM Pune) for helpful comments on  
the possible origins of the observed double-band structure, and Dr. Mark Wang (National Taiwan University) for providing useful references  
490 on the Meiyu front.



## References

- Boers, N., Bookhagen, B., Marwan, N., Kurths, J., and Marengo, J. A.: Complex networks identify spatial patterns of extreme rainfall events of the South American Monsoon System, *Geophys. Res. Lett.*, 40, 4386–4392, <https://doi.org/10.1002/grl.50681>, 2013.
- Boers, N., Rheinwalt, A., Bookhagen, B., Barbosa, H. M. J., Marwan, N., Marengo, J. A., and Kurths, J.: The South American rainfall dipole  
495 : A complex network, *Geophys. Res. Lett.*, 41, 7397–7405, <https://doi.org/10.1002/2014GL061829.1>, 2014.
- Chen, G. T.-J.: Large-Scale Circulations Associated with the East Summer Monsoon and the Mei-Yu over South China and Taiwan, *J. Meteorological Soc. Japan*, 72, 959–983, 1994.
- Cheung, K. K. W. and Ozturk, U.: Synchronization of extreme rainfall during the Australian summer monsoon: Complex network perspectives, *Chaos*, 30, 063 117, <https://doi.org/10.1063/1.5144150>, 2020.
- 500 Choi, K.-S., Wang, B., and Kim, D.-W.: Changma onset definition in Korea using the available water resources index and its relation to the Antarctic oscillation, *Clim. Dyn.*, 38, 547–562, <https://doi.org/10.1007/s00382-010-0957-1>, 2012.
- Cierner, C., Boers, N., Barbosa, H. M. J., Kurths, J., and Rammig, A.: Temporal evolution of the spatial covariability of rainfall in South America, *Climate Dynamics*, 51, 371–382, <https://doi.org/10.1007/s00382-017-3929-x>, 2018.
- Di Capua, G., Kretschmer, M., Donner, R. V., van den Hurk, B., Vellore, R., Krishnan, R., and Coumou, D.: Tropical and mid-latitude  
505 teleconnections interacting with the Indian summer monsoon rainfall: a theory-guided causal effect network approach, *Earth System Dynamics*, 11, 17–34, <https://doi.org/10.5194/esd-11-17-2020>, 2020.
- Dijkstra, H. A., Hernández-García, E., Masoller, C., and Barreiro, M., eds.: *Networks in Climate*, Cambridge University Press, 2019.
- Donges, J. F., Zou, Y., Marwan, N., and Kurths, J.: The backbone of the climate network, *EPL*, 87, 48 007, 2009.
- Donges, J. F., Schultz, H. C., Marwan, N., Zou, Y., and Kurths, J.: Investigating the topology of interacting networks: Theory and application  
510 to coupled climate subnetworks, *Eur. Phys. J. B*, 84, 635–651, <https://doi.org/10.1140/epjb/e2011-10795-8>, 2011.
- Donges, J. F., Heitzig, J., Beronov, B., Wiedermann, M., Runge, J., Feng, Q. Y., Stolbova, V., Donner, R. V., Marwan, N., Dijkstra, H. A., and Kurths, J.: Unified functional network and nonlinear time series analysis for complex systems science: The pyunicorn package, *Chaos*, 25, <https://doi.org/10.1063/1.4934554>, 2015.
- Donges, J. F., Schleussner, C. F., Siegmund, J. F., and Donner, R. V.: Event coincidence analysis for quantifying statistical interrelationships  
515 between event time series, *Eur. Phys. J. Spec. Top.*, 225, 471–487, <https://doi.org/10.1140/epjst/e2015-50233-y>, 2016.
- Donner, R. V., Wiedermann, M., and Donges, J. F.: *Complex Network Techniques for Climatological Data Analysis*, in: *Nonlinear and Stochastic Climate Dynamics*, edited by Franzke, C. and O’Kane, T., pp. 159–183, Cambridge University Press, Cambridge, 1 edn., 2017.
- Fortunato, S.: Community detection in graphs, *Physics Reports*, 486, 75 – 174, <https://doi.org/10.1016/j.physrep.2009.11.002>, 2010.
- Fortunato, S. and Hric, D.: Community detection in networks: A user guide, *Physics Reports*, 659, 1 – 44,  
520 <https://doi.org/10.1016/j.physrep.2016.09.002>, community detection in networks: A user guide, 2016.
- Fukui, E.: Distribution of extraordinarily heavy rainfalls in Japan, *Geogr. Rev. Jpn.*, 43, 581–593, 1970.
- Gelbrecht, M., Boers, N., and Kurths, J.: Phase coherence between precipitation in South America and Rossby waves, *Sci. Adv.*, 8, 2018.
- GESDISC: Goddard Earth Sciences Data and Information Services Center, TRMM (TMPA) Precipitation L3 1 day 0.25 degree x 0.25 degree  
V7, 35, 2016.
- 525 Guan, P., Chen, G., Zeng, W., and Liu, Q.: Corridors of Mei-Yu-Season Rainfall over Eastern China, *J. Clim.*, 23, 2603–2626, <https://doi.org/10.1175/JCLI-D-19-0649.1>, 2020.
- Hassanibesheli, F. and Donner, R. V.: Network inference from the timing of events in coupled dynamical systems, *Chaos*, 29, 083 125, 2019.

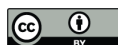

- He, S.-H., Feng, T.-C., Gong, Y.-C., Huang, Y.-H., Wu, C.-G., and Gong, Z.-Q.: Predicting extreme rainfall over eastern Asia by using complex networks, *Chinese Physics B*, 23, 059 202, <https://doi.org/10.1088/1674-1056/23/5/059202>, 2014.
- 530 Heitzig, J., Donges, J. F., Zou, Y., Marwan, N., and Kurths, J.: Node-weighted measures for complex networks with spatially embedded, sampled, or differently sized nodes, *Eur. Phys. J. B*, 85, 38, 2012.
- Kalnay, E., Kanamitsu, M., Kistler, R., Collins, W., Deaven, D., Gandin, L., Iredell, M., Saha, S., White, G., Woolen, J., Zhu, Y., Chelliah, M., Ebisuzaki, W., Higgins, W., Janowiak, J., Mo, K. C., Ropelewski, C., Wang, J., Leetmaa, A., Reynolds, R., Jenne, R., and Joseph, D.: The NCEP / NCAR 40-Year Reanalysis Project, *Bull. Am. Meteorol. Soc.*, 77, 437–472, 1996.
- 535 Kanamitsu, B. Y. M., Ebisuzaki, W., Jack, W., Yang, S.-K., Hnilo, J. J., Fiorino, M., and Potter, G. L.: NCEP-DOE AMIP-II Reanalysis (R-2), *Bull. Am. Meteorol. Soc.*, 83, 1631–1644, <https://doi.org/10.1175/BAMS-83-11>, 2002.
- Kawale, J., Liess, S., Kumar, A., Steinbach, M., Ganguly, A., Samatova, N., Semazzi, F., Snyder, P., and Kumar, V.: Data guided discovery of dynamic climate dipoles, pp. 30–44, *nASA Conference on Intelligent Data Understanding, CIDU*, 2011.
- Kretschmer, M., Coumou, D., Donges, J. F., and Runge, J.: Using Causal Effect Networks to Analyze Different Arctic Drivers of Midlatitude Winter Circulation, *Journal of Climate*, 29, 4069–4081, <https://doi.org/10.1175/JCLI-D-15-0654.1>, 2016.
- 540 Krishnan, R. and Sugi, M.: Baiu Rainfall Variability and Associated Monsoon Teleconnections, *J. Meteorological Soc. Japan*, 79, 851–860, 2001.
- Li, H., He, S., Fan, K., and Wang, H.: Relationship between the onset date of the Meiyu and the South Asian anticyclone in April and the related mechanisms, *Clim. Dyn.*, 52, 209–226, <https://doi.org/10.1007/s00382-018-4131-5>, 2018.
- 545 Liu, Y. and Ding, Y.: Teleconnection between the Indian summer monsoon onset and the Meiyu over the Yangtze River Valley, *Sci. China Ser. D Earth Sci.*, 51, 1021–1035, <https://doi.org/10.1007/s11430-008-0073-9>, 2008.
- Malik, N., Marwan, N., and Kurths, J.: Nonlinear Processes in Geophysics Spatial structures and directionalities in Monsoonal precipitation over South Asia, *Nonlinear Process. Geophys.*, 17, 371–381, <https://doi.org/10.5194/npg-17-371-2010>, 2010.
- Malik, N., Bookhagen, B., Marwan, N., and Kurths, J.: Analysis of spatial and temporal extreme monsoonal rainfall over South Asia using complex networks, *Clim. Dyn.*, 39, 971–987, <https://doi.org/10.1007/s00382-011-1156-4>, 2012.
- 550 Newman, M. E. J.: Modularity and community structure in networks, *Proc. Natl. Acad. Sci.*, 103, 8577–8582, <https://doi.org/10.1073/pnas.0601602103>, 2006.
- Ninomiya, K. and Muraki, H.: Large-Scale Circulations over East Asia during Baiu Period of 1979, *J. Meteorological Soc. Japan*, 64, 409–429, 1986.
- 555 Odenweller, A. and Donner, R. V.: Disentangling synchrony from serial dependency in paired-event time series, *Phys. Rev. E*, 101, 052 213, <https://doi.org/10.1103/PhysRevE.101.052213>, 2020.
- Okada, Y. and Yamazaki, K.: Climatological Evolution of the Okinawa Baiu and Differences in Large-Scale Features during May and June, *J. Clim.*, 25, 6287–6303, <https://doi.org/10.1175/JCLI-D-11-00631.1>, 2012.
- Ozturk, U., Marwan, N., Korup, O., Saito, H., Agarwal, A., Grossman, M. J., Zaiki, M., and Kurths, J.: Complex networks for tracking extreme rainfall during typhoons, *Chaos*, 28, <https://doi.org/10.1063/1.5004480>, 2018.
- 560 Ozturk, U., Malik, N., Cheung, K., Marwan, N., and Kurths, J.: A network - based comparative study of extreme tropical and frontal storm rainfall over Japan, *Clim. Dyn.*, 53, 521–532, <https://doi.org/10.1007/s00382-018-4597-1>, <http://dx.doi.org/10.1007/s00382-018-4597-1>, 2019.
- Preethi, B., Mujumdar, M., Kripalani, R. H., Prabhu, A., and Krishnan, R.: Recent trends and tele - connections among South and East Asian summer monsoons in a warming environment, *Clim. Dyn.*, 48, 2489–2505, <https://doi.org/10.1007/s00382-016-3218-0>, 2017.
- 565





- Quiroga, R. Q., Kreuz, T., and Grassberger, P.: Event synchronization: A simple and fast method to measure synchronicity and time delay patterns, *Phys. Rev. E*, 66, 041 904, <https://doi.org/10.1103/PhysRevE.66.041904>, 2002.
- Rheinwalt, A., Marwan, N., Kurths, J., Werner, P., and Gerstengabe, F.-W.: Boundary effects in network measures of spatially embedded networks, *EPL*, 100, 28 002, 2012.
- 570 Rosvall, M. and Bergstrom, C. T.: Maps of random walks on complex networks reveal community structure, *PNAS*, 105, 1118–1123, 2008.
- Runge, J., Petoukhov, V., Donges, J. F., Hlinka, J., Jajcay, N., Vejmelka, M., Hartman, D., Marwan, N., Palus, M., and Kurths, J.: Identifying causal gateways and mediators in complex spatio-temporal systems, *Nature Communications*, 6, 8502, <https://doi.org/10.1038/ncomms9502>, 2015.
- Sampe, T. and Xie, S.-P.: Large-Scale Dynamics of the Meiyu-Baiu Rainband : Environmental Forcing by the Westerly Jet, *J. Clim.*, 23, 575 113–134, <https://doi.org/10.1175/2009JCLI3128.1>, 2010.
- Stolbova, V., Martin, P., Bookhagen, B., Marwan, N., and Kurths, J.: Topology and seasonal evolution of the network of extreme precipitation over the Indian subcontinent and Sri Lanka, *Nonlinear Process. Geophys.*, 21, 901–917, <https://doi.org/10.5194/npg-21-901-2014>, 2014.
- Suda, K. and Asakura, T.: A study on the Unusual Baiu Season in 1954 by Means of Northern Atmosphere Upper Air Mean Charts, *J. Meteorological Soc. Japan*, 33, 233–244, 1955.
- 580 Tan, J., Jakob, C., Rossow, W. B., and Tselioudis, G.: Increases in tropical rainfall driven by changes in frequency of organized deep convection, *Nature*, 519, 451–454, <https://doi.org/10.1038/nature14339>, 2015.
- Tomita, T., Yamaura, T., and Hashimoto, T.: Interannual Variability of the Baiu Season near Japan Evaluated from the Equivalent Potential Temperature, *J. Meteorological Soc. Japan*, 89, 517–537, <https://doi.org/10.2151/jmsj.2011-507>, 2011.
- Tsonis, A. A. and Roebber, P. J.: The architecture of the climate network, *Phys. A*, 333, 497–504, 2004.
- 585 Ueda, H. and Yasunari, T.: Abrupt Seasonal Change of Large-Scale Convective Activity, *J. Meteorological Soc. Japan*, 73, 795–809, 1995.
- Wang, S. S.-Y., Kim, H., Coumou, D., Yoon, J.-H., Zhao, L., and Gillies, R. R.: Consecutive extreme flooding and heat wave in Japan: Are they becoming a norm?, *Atmospheric Science Letters*, 20, e933, <https://doi.org/10.1002/asl.933>, 2019.
- Wiedermann, M., Donges, J. F., Kurths, J., and Donner, R. V.: Mapping and discrimination of networks in the complexity-entropy plane, *Phys. Rev. E*, 96, 042 304, 2017.
- 590 Wolf, F., Bauer, J., Boers, N., and Donner, R. V.: Event synchrony measures for functional climate network analysis: A case study on South American rainfall dynamics, *Chaos*, 30, 033 102, <https://doi.org/10.1063/1.5134012>, 2020.
- Yihui, D. and Chan, J. C. L.: The East Asian summer monsoon : an overview, *Meteorol. Atmos. Phys.*, 89, 117–142, <https://doi.org/10.1007/s00703-005-0125-z>, 2005.
- Zhu, J., Huang, D.-Q., Zhang, Y.-C., Huang, A.-N., Kuang, X.-Y., and Huang, Y.: Decadal changes of Meiyu rainfall around 1991 and its 595 relationship with two types of ENSO, *J. Geophys. Res. Atmos.*, 118, 9766–9777, <https://doi.org/10.1002/jgrd.50779>, 2013.
- Zhu, X., Wu, Z., and He, J.: Anomalous Meiyu onset averaged over the Yangtze River valley, *Theor. Appl. Climatol.*, 94, 81–95, <https://doi.org/10.1007/s00704-007-0347-8>, 2008.
